# Supplementary material for: Characterization of 7A5: A Human CD137 (4-1BB) Receptor Binding Monoclonal Antibody with Differential Agonist Properties That Promotes Antitumor Immunity
Source: Oxford University Press journal article supplement (doi:10.1158/1535-7163.mct-19-0893), 2020-04-01
Supplement: 15357163mct190893-sup-229073_2_supp_6042149_q4jmxh.docx [file 15357163mct190893-sup-229073_2_supp_6042149_q4jmxh.docx]

**Supplementary Table S1.**

Human immune effector Fc and C1Q binding EC50 (nM)

| **Antibody** | **FcγRI** | **FcγRIIa(H)** | **FcγRIIb** | **FcγRIIIa(F)** | **FcγRIIIa(V)** | **C1q** |
| --- | --- | --- | --- | --- | --- | --- |
| **7A5 IgG1** | 0.27 | 97.18 | >134* | 68.89 | 40.89 | 27.07 |
| **7A5 IgG1-EN** | >5* | >134* | >134* | >134* | >134* | >330* |
| **Rituximab** | 0.78 | 93.7 | >134* | 19.0 | 6.15 | 8.9 |

*Maximum concentration of Ab tested. EN: effector null.
