# Supplementary material for: Characterization of 7A5: A Human CD137 (4-1BB) Receptor Binding Monoclonal Antibody with Differential Agonist Properties That Promotes Antitumor Immunity
Source: Oxford University Press journal article supplement (doi:10.1158/1535-7163.mct-19-0893), 2020-04-01
Supplement: 15357163mct190893-sup-229073_2_supp_6042150_q4jmxh.docx [file 15357163mct190893-sup-229073_2_supp_6042150_q4jmxh.docx]

**Supplementary Table S2.**

Human immune effector ADCC and CDC activity EC50 (nM)

| **Antibody** | **ADCC** | **CDC** |
| --- | --- | --- |
| **7A5 IgG1** | 2.4 | >360* |
| **7A5 IgG1-EN** | >200* | >360* |
| **Rituximab** | 0.012 | 3.213 |

*Maximum concentration of antibody tested. EN: effector null.
