# Supplementary material for: Characterization of 7A5: A Human CD137 (4-1BB) Receptor Binding Monoclonal Antibody with Differential Agonist Properties That Promotes Antitumor Immunity
Source: Oxford University Press journal article supplement (doi:10.1158/1535-7163.mct-19-0893), 2020-04-01
Supplement: 15357163mct190893-sup-229073_2_supp_6042176_q4jmch.docx [file 15357163mct190893-sup-229073_2_supp_6042176_q4jmch.docx]

**Supplementary Figure S2.**

A.

B.

Figure S2. Species cross-reactivity of 7A5 antibody in binding ELISA. (A) Binding of 7A5 to immobilized recombinant cynomolgus monkey CD137 protein. Titrations of 7A5 and human IgG1 are shown; 7A5 EC50 =0.011nM. (B) 7A5 does not bind immobilized recombinant mouse CD137 protein (LOB12.3 is positive control antibody). One representative experiment for each species is shown.
