# Supplementary material for: Characterization of 7A5: A Human CD137 (4-1BB) Receptor Binding Monoclonal Antibody with Differential Agonist Properties That Promotes Antitumor Immunity
Source: Oxford University Press journal article supplement (doi:10.1158/1535-7163.mct-19-0893), 2020-04-01
Supplement: 15357163mct190893-sup-229073_2_supp_6042177_q4jmch.docx [file 15357163mct190893-sup-229073_2_supp_6042177_q4jmch.docx]

**Supplementary Figure S3.**

Figure S3. CD137 receptor modulation in response to CD137 antibody. Human CD137-293 cells were treated with 7A5, BMS20H4.9 or control IgG1 across a range of concentrations for 24 hours and receptor levels measured by flow cytometry. The percentage CD137 staining cells is shown in this representative experiment.
