# Supplementary material for: Characterization of 7A5: A Human CD137 (4-1BB) Receptor Binding Monoclonal Antibody with Differential Agonist Properties That Promotes Antitumor Immunity
Source: Oxford University Press journal article supplement (doi:10.1158/1535-7163.mct-19-0893), 2020-04-01
Supplement: 15357163mct190893-sup-229073_2_supp_6042178_q4jmch.docx [file 15357163mct190893-sup-229073_2_supp_6042178_q4jmch.docx]

**Supplementary Figure S4.**

Figure S4. CD137 antibody 7A5 enhances the memory T cell population. Human CD8 T cells were treated with 7A5 (0.5 to 50g/mL), BMS20H4.9 (50g/mL) or control IgG1 (50g/mL) for up to 8 days and staining for memory T cell markers (CD45RA and CCR7) measured by flow cytometry. Shown is the frequency of memory T cells relative to control IgG1 for 7A5 (*P =0.0018, **P =0.0033) and BMS20H4.9 (***P =0.0237) by one-way ANOVA.
