# Supplementary material for: Characterization of 7A5: A Human CD137 (4-1BB) Receptor Binding Monoclonal Antibody with Differential Agonist Properties That Promotes Antitumor Immunity
Source: Oxford University Press journal article supplement (doi:10.1158/1535-7163.mct-19-0893), 2020-04-01
Supplement: 15357163mct190893-sup-229073_2_supp_6042179_q4jmch.docx [file 15357163mct190893-sup-229073_2_supp_6042179_q4jmch.docx]

**Supplementary Figure S5.**

**
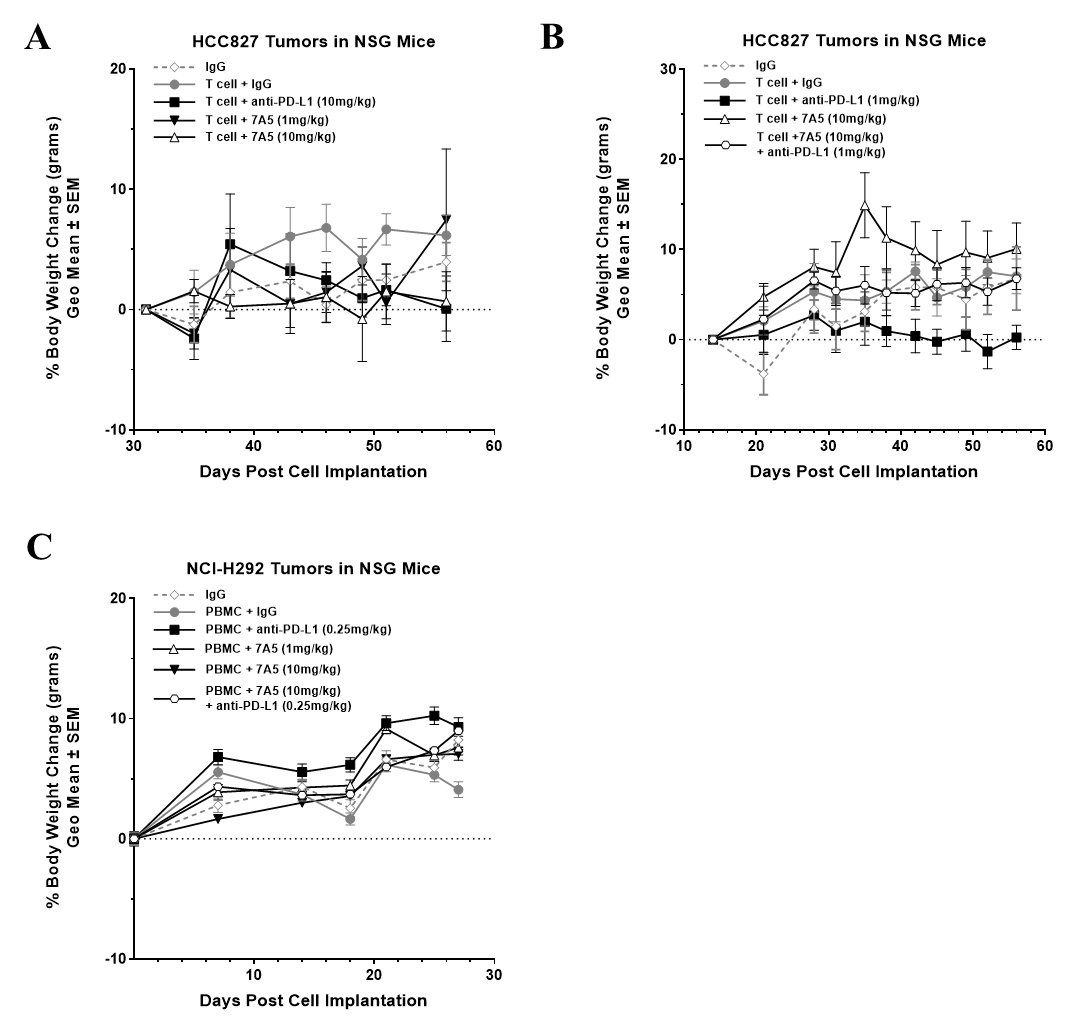
**

Figure S5. Body weight graphs of humanized murine in vivo models treated with CD137 antibody 7A5. (A) Dose response study in HCC827 established tumor model. (B) Combination therapy study in HCC827 established tumor model. (C) Dose response and combination therapy study in NCI-H292 human tumor xenograft mouse model.
