# Supplementary material for: Characterization of 7A5: A Human CD137 (4-1BB) Receptor Binding Monoclonal Antibody with Differential Agonist Properties That Promotes Antitumor Immunity
Source: Oxford University Press journal article supplement (doi:10.1158/1535-7163.mct-19-0893), 2020-04-01
Supplement: 15357163mct190893-sup-229073_2_supp_6042181_q4jmch.docx [file 15357163mct190893-sup-229073_2_supp_6042181_q4jmch.docx]

**Supplementary Figure S7.**


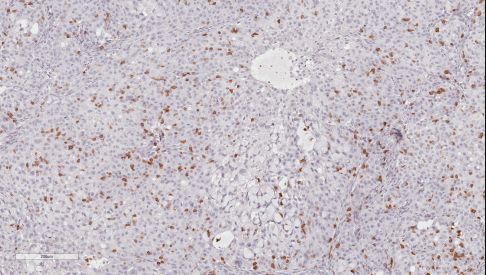


++

**IgG**


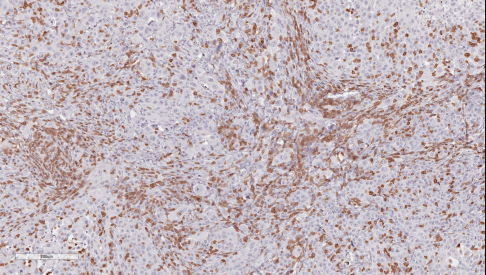


+++

**7A5**

Figure S7. Enhanced T cells in 7A5 treated L55 established human tumor xenografts reconstituted with human immune cells in vivo. CD3 T cell IHC of L55 tumors collected from 7A5 or control human IgG1 treated NSG mice. Representative images of CD3 staining are depicted (200x magnification).
