# Supplementary material for: Characterization of 7A5: A Human CD137 (4-1BB) Receptor Binding Monoclonal Antibody with Differential Agonist Properties That Promotes Antitumor Immunity
Source: Oxford University Press journal article supplement (doi:10.1158/1535-7163.mct-19-0893), 2020-04-01
Supplement: 15357163mct190893-sup-229073_2_supp_6042182_q4jmch.docx [file 15357163mct190893-sup-229073_2_supp_6042182_q4jmch.docx]

**Supplementary Figure S8.**

Figure S8. Tumor volume graph of NCI-H292 human tumor xenograft mouse model reconstituted with human immune cells in vivo. NSG mice were co-implanted with NCI-H292 tumor cells and human PBMCs. Treatment at indicated dose was started on day 0 (black arrow; 7A5 on day 1, grey arrow) and thereafter received on day 7 and 14. Tumor tissues were collected on day 15 (n=5 per group) and snap frozen for gene expression profiling.
